# Supplementary material for: Open-Book Assessment in French Language Instruction: A Study on Enhancing the Grammatical Skills of Pre-service Teachers
Source: Research Square preprint supplement (doi:10.21203/rs.3.rs-6957341/v1), 2025-07-18
Supplement: Supplementary file 1 [file f72ad3b3ad5fc702bd40494f.docx]

**Version A (Pre-Test)**

**Test de Compétences Grammaticales en Français**

**Nom:** _________________________
**Date:** _________________________
**Total:** / 25 points

**Instructions:** Lisez attentivement chaque question et répondez du mieux que vous pouvez.

**Section A: Le Subjonctif (9 points)**

1. Mettez le verbe entre parenthèses au subjonctif présent. (5 pts)
   a. Il faut que tu ____________ (finir) tes devoirs.
   b. Je ne pense pas qu'il ____________ (savoir) la réponse.
   c. Bien qu'elle ____________ (être) fatiguée, elle continue à travailler.
   d. Nous cherchons un professeur qui ____________ (pouvoir) nous aider.
   e. Il est important que vous ____________ (boire) beaucoup d'eau.
2. Créez une phrase complète en utilisant l'amorce et le verbe donnés. (4 pts)
   a. Pour que / les étudiants / comprendre -> ____________________________________
   b. Avant que / vous / partir -> _______________________________________________

**Section B: L'Accord du Participe Passé (8 points)**
Mettez le verbe entre parenthèses au passé composé, en faisant attention à l'accord du participe passé.
a. Les lettres que j'ai ____________ (écrire) sont sur la table.
b. Elle s'est ____________ (laver) les mains avant de manger.
c. Marie et Sophie sont ____________ (aller) au cinéma hier soir.
d. La pomme ? Je l'ai ____________ (manger) ce matin.
e. Ils se sont ____________ (téléphoner) pendant des heures.

**Section C: Les Pronoms Objets (8 points)**

1. Réécrivez les phrases en remplaçant les mots soulignés par les pronoms objets qui conviennent. (4 pts)
   a. Le professeur explique **la leçon** **aux étudiants**. -> _________________________
   b. J'ai donné **les fleurs** **à ma mère**. -> ____________________________________
2. Répondez aux questions en utilisant les pronoms objets. (4 pts)
   a. As-tu vu **le film** ? -> Oui, ____________________________________________.
   b. Tu vas parler **à tes parents** ce soir ? -> Non, ______________________________.

**Version B (Post-Test)**

**Test de Compétences Grammaticales en Français**

**Nom:** _________________________
**Date:** _________________________
**Total:** / 25 points

**Instructions:** Lisez attentivement chaque question et répondez du mieux que vous pouvez.

**Section A: Le Subjonctif (9 points)**

1. Mettez le verbe entre parenthèses au subjonctif présent. (5 pts)
   a. Il est nécessaire que nous ____________ (faire) nos exercices.
   b. Je doute qu'elle ____________ (venir) à la fête.
   c. Quoiqu'il ____________ (avoir) beaucoup d'argent, il n'est pas heureux.
   d. J'aimerais trouver une amie qui ____________ (être) honnête.
   e. Il est essentiel que tu ____________ (prendre) tes médicaments.
2. Créez une phrase complète en utilisant l'amorce et le verbe donnés. (4 pts)
   a. Afin que / vous / réussir -> _______________________________________________
   b. Avant que / il / commencer -> _____________________________________________

**Section B: L'Accord du Participe Passé (8 points)**
Mettez le verbe entre parenthèses au passé composé, en faisant attention à l'accord du participe passé.
a. Les chansons que tu as ____________ (chanter) étaient magnifiques.
b. Elle s'est ____________ (casser) la jambe en skiant.
c. Luc et Marc sont ____________ (partir) en vacances la semaine dernière.
d. La voiture ? Mon père l'a ____________ (vendre) hier.
e. Elles se sont ____________ (parler) après la dispute.

**Section C: Les Pronoms Objets (8 points)**

1. Réécrivez les phrases en remplaçant les mots soulignés par les pronoms objets qui conviennent. (4 pts)
   a. La mère lit **une histoire** **à son enfant**. -> ______________________________
   b. Nous avons envoyé **le colis** **à nos amis**. -> _____________________________
2. Répondez aux questions en utilisant les pronoms objets. (4 pts)
   a. Avez-vous lu **ces livres** ? -> Oui, _________________________________________.
   b. Il va donner la clé **au voisin** ? -> Non, ___________________________________.

**Instrument 2: Example Quizzes (Week 4: L'Accord du Participe Passé)**

**Quiz A: Closed-Book (Control Group)**

**Instructions:** Complétez ce quiz sans utiliser votre livre ou vos notes.

1. Mettez les verbes suivants au passé composé avec le sujet "elle". (3 pts)
   a. arriver -> _________________
   b. voir -> _________________
   c. se lever -> _________________
2. Énoncez la règle d'accord du participe passé avec l'auxiliaire 'avoir'. (2 pts)
3. Complétez les phrases avec la forme correcte du participe passé. (5 pts)
   a. Les fleurs que j'ai reçu___ sont belles.
   b. Elle est sorti___ avec ses amies.
   c. La tarte ? Nous l'avons mangé___.
   d. Ils se sont écrit___.
   e. Mes tantes sont venu___.

**Quiz B: Open-Book (Experimental Group)**

**Instructions:** Vous pouvez utiliser votre livre et vos notes pour compléter ce quiz.

1. **Analyse d'Erreurs (5 pts):** Les phrases suivantes contiennent des erreurs d'accord. Corrigez chaque phrase et, en utilisant vos notes, citez la règle qui justifie votre correction.
   a. *La décision que j'ai prend était difficile.*
   Correction: __________________________________________________
   Justification: _______________________________________________
   b. *Elles se sont sourit quand elles se sont vues.*
   Correction: __________________________________________________
   Justification: _______________________________________________
2. **Application Contextuelle (5 pts):** Racontez brièvement une journée de shopping que vous avez faite récemment. Écrivez 4-5 phrases au passé composé. Vous devez utiliser au moins : un verbe avec 'être', un verbe avec 'avoir' et un COD placé avant, et un verbe pronominal. Soulignez les participes passés que vous avez accordés.

**Instrument 2 (French) : Questionnaire sur les Perceptions de l'Évaluation**

Consignes : Ce questionnaire vise à recueillir votre avis concernant les tests à livre ouvert utilisés dans votre cours de grammaire française. Veuillez indiquer votre degré d'accord ou de désaccord avec chaque affirmation. Vos réponses sont confidentielles.

(Échelle : 1 = Pas du tout d'accord, 2 = Pas d'accord, 3 = Neutre, 4 = D'accord, 5 = Tout à fait d'accord)

**Section A : Impact sur l'Apprentissage et la Compréhension**

1. Les tests à livre ouvert m'ont aidé(e) à me concentrer sur l'application des règles de grammaire plutôt que sur leur simple mémorisation.
   (1 2 3 4 5)
2. J'ai le sentiment d'avoir une compréhension plus approfondie de la grammaire française grâce au format à livre ouvert.
   (1 2 3 4 5)
3. Les tests à livre ouvert étaient plus exigeants sur le plan intellectuel que les tests traditionnels à livre fermé.
   (1 2 3 4 5)
4. Ce format d'évaluation m'a aidé(e) à comprendre *pourquoi* une règle est utilisée, et pas seulement *quelle* est la règle.
   (1 2 3 4 5)

**Section B : Confiance et Anxiété**

1. Je me suis senti(e) moins anxieux/anxieuse durant les tests à livre ouvert que je ne le suis habituellement pendant les examens.
   (1 2 3 4 5)
2. Les tests à livre ouvert m'ont donné plus de confiance en ma capacité à utiliser correctement la grammaire française.
   (1 2 3 4 5)
3. Je crois que le format à livre ouvert était une manière équitable d'évaluer ma compréhension.
   (1 2 3 4 5)

**Section C : Intentions Pédagogiques Futures**

1. Cette expérience a changé ma façon de penser l'évaluation dans un cours de langue.
   (1 2 3 4 5)
2. J'envisagerais d'utiliser des évaluations à livre ouvert pour enseigner la grammaire dans ma future salle de classe.
   (1 2 3 4 5)
3. Je crois que cette méthode est efficace pour aider les étudiants à apprendre la grammaire complexe.
   (1 2 3 4 5)

**Question Ouverte :**

1. Veuillez partager ci-dessous vos autres commentaires ou réflexions sur votre expérience avec les tests à livre ouvert.

**Instrument 3: Perceptions of Assessment Survey (PAS)**

**Instructions:** This survey is designed to gather your opinions about the open-book quizzes used in your French grammar class. Please indicate the extent to which you agree or disagree with each statement. Your responses are confidential.

(Scale: 1 = Strongly Disagree, 2 = Disagree, 3 = Neutral, 4 = Agree, 5 = Strongly Agree)

**Section A: Impact on Learning and Understanding**

1. The open-book quizzes helped me focus on applying grammar rules rather than just memorizing them. (1 2 3 4 5)
2. I feel I have a deeper understanding of French grammar because of the open-book format. (1 2 3 4 5)
3. The open-book quizzes were more challenging intellectually than typical closed-book tests. (1 2 3 4 5)
4. This assessment format helped me understand *why* a rule is used, not just *what* the rule is. (1 2 3 4 5)

**Section B: Confidence and Anxiety**
5. I felt less anxious during the open-book quizzes than I normally do during exams. (1 2 3 4 5)
6. The open-book quizzes made me feel more confident in my ability to use French grammar correctly. (1 2 3 4 5)
7. I believe the open-book format was a fair way to assess my understanding. (1 2 3 4 5)

**Section C: Future Pedagogical Intentions**
8. This experience has changed how I think about testing and assessment in a language class. (1 2 3 4 5)
9. I would consider using open-book assessments to teach grammar in my own future classroom. (1 2 3 4 5)
10. I believe this method is effective for helping students learn complex grammar. (1 2 3 4 5)

**Open-Ended Question:**
11. Please share any other thoughts or comments about your experience with the open-book quizzes.
________________________________________________________________________

**Instrument 3 : Questionnaire sur les Perceptions de l'Évaluation**

**Consignes :** Ce questionnaire vise à recueillir votre avis concernant les tests à livre ouvert utilisés dans votre cours de grammaire française. Veuillez indiquer votre degré d'accord ou de désaccord avec chaque affirmation. Vos réponses sont confidentielles.

**(Échelle : 1 = Pas du tout d'accord, 2 = Pas d'accord, 3 = Neutre, 4 = D'accord, 5 = Tout à fait d'accord)**

**Section A : Impact sur l'Apprentissage et la Compréhension**

1. Les tests à livre ouvert m'ont aidé(e) à me concentrer sur l'application des règles de grammaire plutôt que sur leur simple mémorisation.
   (1 2 3 4 5)
2. J'ai le sentiment d'avoir une compréhension plus approfondie de la grammaire française grâce au format à livre ouvert.
   (1 2 3 4 5)
3. Les tests à livre ouvert étaient plus exigeants sur le plan intellectuel que les tests traditionnels à livre fermé.
   (1 2 3 4 5)
4. Ce format d'évaluation m'a aidé(e) à comprendre *pourquoi* une règle est utilisée, et pas seulement *quelle* est la règle.
   (1 2 3 4 5)

**Section B : Confiance et Anxiété**

1. Je me suis senti(e) moins anxieux/anxieuse durant les tests à livre ouvert que je ne le suis habituellement pendant les examens.
   (1 2 3 4 5)
2. Les tests à livre ouvert m'ont donné plus de confiance en ma capacité à utiliser correctement la grammaire française.
   (1 2 3 4 5)
3. Je crois que le format à livre ouvert était une manière équitable d'évaluer ma compréhension.
   (1 2 3 4 5)

**Section C : Intentions Pédagogiques Futures**

1. Cette expérience a changé ma façon de penser l'évaluation dans un cours de langue.
   (1 2 3 4 5)
2. J'envisagerais d'utiliser des évaluations à livre ouvert pour enseigner la grammaire dans ma future salle de classe.
   (1 2 3 4 5)
3. Je crois que cette méthode est efficace pour aider les étudiants à apprendre la grammaire complexe.
   (1 2 3 4 5)

**Question Ouverte :**

1. Veuillez partager ci-dessous vos autres commentaires ou réflexions sur votre expérience avec les tests à livre ouvert.

**Instrument 4: Semi-Structured Interview Protocol**

**Researcher's Introduction:** "Thank you for participating in this interview. I'm interested in hearing about your personal experience with the open-book quizzes in your grammar course. There are no right or wrong answers; I just want to understand your perspective. This interview will take about 20 minutes and will be kept confidential. Do you have any questions before we begin?"

**Part 1: The Learning Process & Strategies**

1. To start, can you describe your general experience with the open-book quizzes this semester?
2. Walk me through your process. When you received a quiz, what were the first things you did?
   - *Probe:* How did you use your textbook or notes? Did you look for specific rules, examples?
3. Did your strategy for taking these quizzes change from the first one to the last one? If so, how?

**Part 2: Perceived Impact on Learning**
4. How do you think the open-book format affected your learning of French grammar?
* *Probe:* Did it help you understand certain concepts better? Can you give me an example?
5. Compare this experience to a traditional, closed-book grammar test. What were the main differences for you in terms of what you learned?
6. What did you find to be the biggest advantage of this assessment style? And what was the biggest disadvantage or challenge?

**Part 3: Future Pedagogical Beliefs**
7. Now, I'd like you to think ahead as a future teacher. Has this experience influenced how you think about teaching or assessing grammar?
* *Probe:* In what way?
8. Imagine you are designing a grammar course. Would you use open-book assessments?
* *Probe:* Why or why not? For which topics might it be most useful?
9. Do you believe this method could help your future students overcome common difficulties with French grammar?

**Conclusion:**
10. Is there anything else you'd like to add about your experience that we haven't discussed?
11. Do you have any questions for me?

**Researcher's Closing:** "Thank you so much for your time and for sharing your thoughts so openly. Your insights are incredibly valuable to this study."

**Instrument 4 (French) : Protocole d'Entretien Semi-Dirigé**

**Introduction de l'interviewer :**
"Bonjour et merci d'avoir accepté de participer à cet entretien. Le but est de discuter de votre expérience personnelle avec les tests à livre ouvert dans votre cours de grammaire. Il n'y a pas de bonnes ou de mauvaises réponses ; je souhaite simplement comprendre votre perspective. L'entretien durera environ 20 minutes et restera confidentiel. Avez-vous des questions avant que nous commencions ?"

**Partie 1 : Processus d'Apprentissage et Stratégies**

1. Pour commencer, pourriez-vous décrire votre expérience générale avec les tests à livre ouvert ce semestre ?
2. Expliquez-moi votre démarche. Quand vous receviez un test, quelles étaient les premières choses que vous faisiez ?
   - **Piste de relance :** Comment utilisiez-vous votre manuel ou vos notes ? Cherchiez-vous des règles spécifiques, des exemples ?
3. Est-ce que votre stratégie pour faire ces tests a changé entre le premier et le dernier ? Si oui, comment ?

**Partie 2 : Impact Perçu sur l'Apprentissage**

1. Selon vous, comment le format à livre ouvert a-t-il affecté votre apprentissage de la grammaire française ?
   - **Piste de relance :** Est-ce que cela vous a aidé(e) à mieux comprendre certains concepts ? Pouvez-vous me donner un exemple ?
2. Comparez cette expérience à un test de grammaire traditionnel, à livre fermé. Quelles ont été les principales différences pour vous en termes d'apprentissage ?
3. Quel a été, selon vous, le plus grand avantage de ce style d'évaluation ? Et quel a été le plus grand inconvénient ou défi ?

**Partie 3 : Croyances et Intentions Pédagogiques**

1. Maintenant, j'aimerais que vous vous projetiez en tant que futur(e) enseignant(e). Est-ce que cette expérience a influencé votre manière de concevoir l'enseignement ou l'évaluation de la grammaire ?
   - **Piste de relance :** De quelle manière ?
2. Imaginez que vous concevez un cours de grammaire. Utiliseriez-vous des évaluations à livre ouvert ?
   - **Piste de relance :** Pourquoi ou pourquoi pas ? Pour quels sujets cela pourrait-il être le plus utile ?
3. Pensez-vous que cette méthode pourrait aider vos futurs élèves à surmonter les difficultés courantes en grammaire française ?

**Conclusion**

1. Y a-t-il autre chose que vous aimeriez ajouter sur votre expérience et dont nous n'avons pas discuté ?
2. Avez-vous des questions pour moi ?

**Mot de la fin de l'interviewer :**
"Merci beaucoup pour votre temps et pour avoir partagé vos réflexions si ouvertement. Vos perspectives sont d'une grande valeur pour cette étude."
